# Supplementary material for: Diagnostic and Prognostic Potential of MicroRNA Maturation Regulators Drosha, AGO1 and AGO2 in Urothelial Carcinomas of the Bladder
Source: MDPI journal article supplement (doi:10.3390/ijms19061622), 2018-05-31
Supplement: s1 [file s1]

**Table S1.** Univariate and multivariate Cox proportional hazards regression analyses of clinicopathological parameters and immunohistochemical markers AGO1, AGO2 and Drosha for prediction of survival

| Variable                      | Univariate analysis      |         |                          |         | Multivariate analysis <sup>A</sup> |         |                          |         |
|-------------------------------|--------------------------|---------|--------------------------|---------|------------------------------------|---------|--------------------------|---------|
|                               | Hazard ratio<br>(95% CI) | P value | Hazard ratio<br>(95% CI) | P value | Hazard ratio<br>(95% CI)           | P value | Hazard ratio<br>(95% CI) | P value |
| <b>Age, years<sup>B</sup></b> |                          |         |                          |         |                                    |         |                          |         |
| <69                           | 1.709                    | 0.091   | 3.510                    | 0.002   | 1.891                              | 0.053   | 1.845                    | 0.084   |
| ≥69                           | (0.918-3.182)            |         | (1.573-7.834)            |         | (0.993-3.602)                      |         | (0.921-3.693)            |         |
| <b>Sex</b>                    |                          |         |                          |         |                                    |         |                          |         |
| female                        | 1.190                    | 0.630   | 0.902                    | 0.791   | 1.057                              | 0.880   | 0.913                    | 0.808   |
| male                          | (0.586-2.416)            |         | (0.420-1.937)            |         | (0.516-2.165)                      |         | (0.440-1.896)            |         |
| <b>pT stage</b>               |                          |         |                          |         |                                    |         |                          |         |
| pTa/1(NMIBC)                  | 2.903                    | 0.002   | 4.554                    | 0.002   | 2.335                              | 0.020   | 1.877                    | 0.122   |
| pT2-4 (MIBC)                  | (1.499-5.621)            |         | (1.774-11.693)           |         | (1.142-4.775)                      |         | (0.846-4.167)            |         |
| <b>WHO grade<sup>C</sup></b>  |                          |         |                          |         |                                    |         |                          |         |
| low                           | 5.580                    | 0.001   | 3.753                    | 0.021   | 3.793                              | 0.017   | 3.530                    | 0.025   |
| high                          | (1.990-15.645)           |         | (1.223-11.515)           |         | (1.269-11.332)                     |         | (1.172-10.634)           |         |
| <b>AGO1</b>                   |                          |         |                          |         |                                    |         |                          |         |
| negative                      | 0.941                    | 0.858   | 2.878                    | 0.018   | -                                  | -       | -                        | -       |
| positive                      | (0.481-1.841)            |         | (1.196-6.923)            |         |                                    |         |                          |         |
| <b>AGO2</b>                   |                          |         |                          |         |                                    |         |                          |         |
| negative                      | 1.526                    | 0.229   | -                        | -       | 1.420                              | 0.322   | -                        | -       |
| positive                      | (0.766-3.037)            |         |                          |         | (0.710-2.840)                      |         |                          |         |
| <b>Drosha</b>                 |                          |         |                          |         |                                    |         |                          |         |
| negative                      | 0.523                    | 0.049   | -                        | -       | -                                  | -       | 0.844                    | 0.634   |
| positive                      | (0.274-0.996)            |         |                          |         |                                    |         | (0.419-1.699)            |         |

<sup>A</sup>Inclusion model regarding all clinicopathological variables; <sup>B</sup>Age was dichotomized according to median; <sup>C</sup>WHO/ISUP criteria of 2016.

Number of valid cases: AGO1 n=96, AGO2 n=107, Drosha n=104, all others (univariate) n=110.

CI: Confidence interval; NMIBC: non-muscle-invasive bladder carcinoma; MIBC: muscle-invasive bladder carcinoma
